# Supplementary material
Source: PubMed Central journal article supplement (PMC8855317)
Supplement: jamaoncol-e217366-s001.pdf [file jamaoncol-e217366-s001.pdf]

|    |                                                |
|----|------------------------------------------------|
| 20 | <b>CONTENTS</b>                                |
| 21 | <b>SCHEMA</b>                                  |
| 22 | <b>1·0 Background</b>                          |
| 23 | <b>2·0 Objectives</b>                          |
| 24 | <b>3·0 Subject Enrollment</b>                  |
| 25 | <b>4·0 Treatment Plan</b>                      |
| 26 | <b>5·0 Observation and Assessment</b>          |
| 27 | <b>6·0 Follow up</b>                           |
| 28 | <b>7·0 Safety Measures and Quality Control</b> |
| 29 | <b>8·0 Statistical Analysis</b>                |
| 30 | <b>9·0 Ethical Considerations</b>              |
| 31 | <b>10·0 References</b>                         |
| 32 | <b>Appendix I</b>                              |
| 33 | <b>Appendix II</b>                             |
| 34 |                                                |
| 35 |                                                |

36 **SCHEMA**

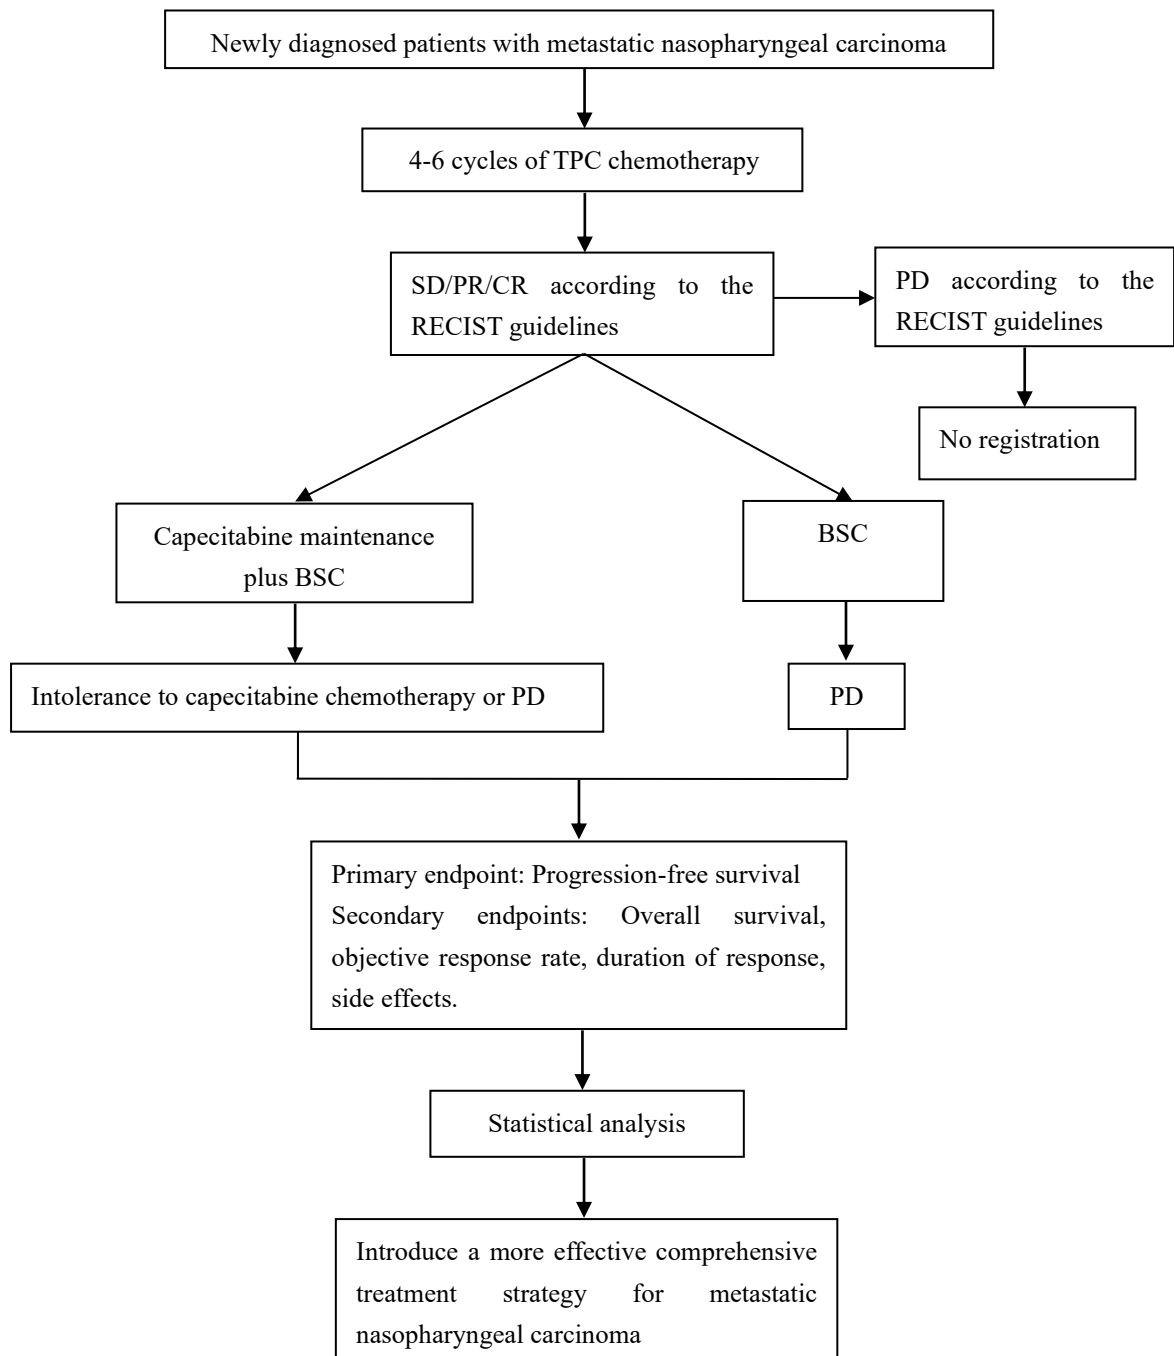

71 **1·0 Background**

72 Nasopharyngeal carcinoma is one of the most common head and neck cancers and prevalent in southeast  
73 Asia and north Africa. Nasopharyngeal carcinoma remains an important cause of cancer-related death  
74 worldwide with an incidence of approximately 50,000 deaths annually.<sup>1</sup> For patients with metastatic  
75 disease, platinum-based combination chemotherapy results in a response rate of 50% to 70% and a  
76 median survival time of approximately 20 months.<sup>2</sup> Chemotherapy is typically administered for  
77 approximately 6 cycles and then discontinued, given concerns for cumulative toxicities in the setting of  
78 diminishing benefit.<sup>3</sup> However, the vast majority of patients experience disease progression soon after  
79 completing first-line chemotherapy, with a median progression-free survival of approximately 3 months.<sup>4</sup>

80 Maintenance treatment with low-dose chemotherapeutic agents aims to extend clinically meaningful  
81 survival by delaying disease progression and to prolong the period between chemotherapy treatments,  
82 thereby allowing patients to avoid the associated toxicities that can affect quality of life.<sup>5</sup> Recently, an  
83 extensive body of research has emerged concerning maintenance therapy in malignant tumours, and  
84 maintenance therapy after chemotherapy may be an attractive strategy for both scientific and pragmatic  
85 reasons.<sup>6,7</sup> The role of maintenance cytotoxic therapy in metastatic nasopharyngeal carcinoma remained  
86 unclear. Capecitabine is an oral fluoropyrimidine agent that can mimic the pharmacokinetics of infusion  
87 5-fluorouracil directed against tumours, and is associated with lower incidence of complications, such as  
88 diarrhea, stomatitis, nausea, and neutropenia, than infusion 5-fluorouracil.<sup>8</sup> Capecitabine has been proved  
89 as an effective maintenance drug, either alone or in combination, in colorectal and breast malignancies,  
90 with additional benefits of improved tolerance and convenience.<sup>8-10</sup> Fluoropyrimidines have evidence of  
91 activity in nasopharyngeal carcinoma.<sup>11</sup> Capecitabine is a potentially suitable agent for maintenance  
92 therapy because its toxicity profile is favorable and without cumulative effects.<sup>12</sup>

93 Therefore, a randomised, phase 3 trial was designed to investigate whether maintenance therapy with  
94 capecitabine plus best supportive care (BSC) therapy would improve progression-free survival for  
95 patients with metastatic nasopharyngeal carcinoma who achieved disease control after 4–6 cycles of TPC  
96 (taxol, cisplatin and capecitabine) palliative chemotherapy compared with BSC alone.

97

98 **2·0 Objectives**

99 **2·1 Primary objective**

100 This study is designed to evaluate and compare the progression-free survival between the

101 capecitabine maintenance therapy plus BSC and BSC alone in newly diagnosed metastatic  
102 nasopharyngeal carcinoma patients after 4–6 cycles of TPC palliative chemotherapy.

### 103 **2·2 Secondary objectives**

104 To evaluate and compare overall survival, duration of response, objective response rate, adverse  
105 effects, and quality of life between the capecitabine maintenance therapy plus BSC and BSC alone  
106 in newly diagnosed metastatic nasopharyngeal carcinoma patients after 4–6 cycles of TPC palliative  
107 chemotherapy.

108

## 109 **3·0 Subject Enrollment**

### 110 **3·1 Eligibility criteria**

111 3·1·1 Firstly diagnosed metastatic nasopharyngeal carcinoma patients

112 3·1·2 Disease controlled after 4–6 cycles of palliative chemotherapy with taxol, cisplatin and  
113 capecitabine.

114 3·1·3 Age 18–65 years.

115 3·1·4 Eastern Cooperative Oncology Group performance status of 0 or 1.

116 3·1·5 Life expectation at least 12 weeks.

117 3·1·6 No systemic chemotherapy within 6 months, except for induction chemotherapy or concurrent  
118 chemotherapy.

119 3·1·7 With at least one measurable lesion according to the Response Evaluation Criteria in Solid  
120 Tumours version 1·1 (RECIST 1·1).

121 3·1·8 Adequate organ function:

122 -White blood cell count of  $\geq 4 \cdot 0 \times 10^9/L$ ; absolute neutrophil count of  $\geq 2 \cdot 0 \times 10^9/L$ ;

123 -Hemoglobin concentrations of  $\geq 90$  g/L; platelet cell count of  $\geq 100 \times 10^9/L$ ;

124 -Aspartate transaminase (AST) and alanine transaminase (ALT) of  $< 2 \cdot 5$  times the upper limit of the  
125 normal;

126 -Creatinine clearance rate of  $> 60$  mL/min.

127 3·1·9 Signed informed consent.

### 128 **3·2 Exclusion criteria**

129 3·2·1 Severe heart disease.

130 3·2·2 HIV infection.

- 131 3·2·3 Severe infection.
- 132 3·2·4 Brain metastasis, except for patients who received radical therapy 6 months ago and were stable  
133 in 4 weeks.
- 134 3·2·5 Allogeneic organ transplantation.
- 135 3·2·6 Malignancy other than nasopharyngeal carcinoma, except: cervical carcinoma in situ, cured  
136 basal cell carcinoma, bladder cancer of Ta, Tis or T1, or any cured cancer for at least 3 years.
- 137 3·2·7 Pregnancy or lactation.
- 138 3·2·8 Difficulty in swallowing.
- 139 3·2·9 Received other test drugs.

### 140 **3·3 Criteria for withdrawal from protocol treatment**

- 141 3·3·1 Disease progression.
- 142 3·3·2 Unacceptable toxicity. The reason(s) must be recorded.
- 143 3·3·3 Intercurrent diseases which may affect assessments of clinical status to a significant degree and  
144 require discontinuation of drug, or both.
- 145 3·3·4 The patient may withdraw from the study at any time for any reason. The reason should be  
146 recorded.

147

## 148 **4 Treatment Plan**

### 149 **4·1 Chemotherapy**

#### 150 **4·1·1 Cisplatin, taxol plus capecitabine regimen**

151 Cisplatin is intravenously given at dose of 60 mg/m<sup>2</sup> on day 1 and once every 3 weeks for maximum  
152 of 6 cycles. Taxol is intravenously given at dose of 150 mg/m<sup>2</sup> on day 1 and once every 3 weeks for  
153 maximum of 6 cycles. Capecitabine 1,000 mg/m<sup>2</sup> orally twice daily on days 1–14 and once every  
154 3 weeks for maximum of 6 cycles.

#### 155 **4·1·2 Administration**

156 To prevent the nephrotoxic effects of cisplatin, we apply a 4-day hydration protocol before and  
157 during the administration of cisplatin (days 1–3) and used furosemide (day 1) and mannitol (days  
158 1–2). We use antiemetic drugs, such as the 5-HT<sub>3</sub>-receptor antagonist dexamethasone, to prevent  
159 chemotherapy-induced nausea and vomiting.

#### 160 **4·1·3 Capecitabine maintenance therapy and best supportive care**

161 Capecitabine maintenance therapy is 1,000 mg/m<sup>2</sup> orally twice daily on days 1–14 and once every  
 162 3 weeks for maximum of 2 years.

163 BSC is defined as those measures designed to provide palliation of symptoms and improve quality  
 164 of life as much as possible.

165 \*If severe tumor compression and destruction symptoms occur during follow-up, including severe  
 166 pain, pathological fracture, etc., then according to the clinical needs to control local symptoms and  
 167 improve quality of life, the appropriate treatment will be provided, including surgery, RT and local  
 168 chemotherapy (e.g., TACE for the treatment of liver metastases)

169 **4.1.4 Dosage adjustments**

170 **4.1.4.1 Dose adjustment for hematologic adverse events**

| Dose adjustment for hematologic toxicity |        |                                |                           |                       |
|------------------------------------------|--------|--------------------------------|---------------------------|-----------------------|
| Absolute neutrophil count                |        | Platelet count                 | Cisplatin dose adjustment | Taxol dose adjustment |
| >1.50×10 <sup>9</sup> /L                 | And    | >75.00×10 <sup>9</sup> /L      | Full dose                 | Full dose             |
| 1.00-1.49×10 <sup>9</sup> /L             | And/or | 50.00-74.99×10 <sup>9</sup> /L | Full dose                 | Full dose             |
| <1.00×10 <sup>9</sup> /L                 | And/or | <50.00×10 <sup>9</sup> /L      | 80%                       | 90%                   |

171 **4.1.4.2 Dose adjustment for non-hematologic adverse events**

| Dose adjustment for renal toxicity |        |                           |                           |                       |
|------------------------------------|--------|---------------------------|---------------------------|-----------------------|
| Absolute creatinine                |        | Creatinine clearance rate | Cisplatin dose adjustment | Taxol dose adjustment |
| ≤ 1.5×upper normal value           | And    | ≥50 mL/min                | Full dose                 | Full dose             |
| >1.5×upper normal value            | And/or | 40-50 mL/min              | 80%                       | Full dose             |
| >1.5×upper normal value            | And/or | <40 mL/min                | Withhold drug             | Withhold drug         |

173

| Hepatic toxicity                                                          | Dose adjustment  |
|---------------------------------------------------------------------------|------------------|
| AST/ALT >2.5 – ≤5×ULN<br>and/or alkaline phosphatase (ALP) >2.5 – ≤ 5×ULN | Decrease 1 level |

|                                                                |                   |
|----------------------------------------------------------------|-------------------|
| and/or bilirubin > 1 – ≤2×ULN                                  |                   |
| AST/ALT >5×ULN<br>and/or ALP >5×ULN<br>and/or bilirubin >2×ULN | Stop chemotherapy |

174

|                           |                   |                  |
|---------------------------|-------------------|------------------|
| Gastrointestinal toxicity |                   | Dose adjustment  |
| Grade 3                   | First episode     | Full dose        |
|                           | Second episode    | Decrease 1 level |
| Grade 4                   | Stop chemotherapy |                  |

175

|                     |    |                        |                       |
|---------------------|----|------------------------|-----------------------|
| Peripheral neuritis |    | limb joint muscle pain | Taxol dose adjustment |
| level 2             | Or | level 2                | 80%                   |
| level 3             | Or | level 3                | Withhold drug         |
| level 4             | Or | level 4                | Withhold drug         |

176

177

178

**4.1.4.3** Local label should be used for capecitabine dose modifications for the management of adverse reactions

| Toxicity*                  | During a course of therapy            | Dose adjustment for next treatment (% of starting dose) |
|----------------------------|---------------------------------------|---------------------------------------------------------|
| Grade 1                    | Maintain dose level                   | Maintain dose level                                     |
| Grade 2                    |                                       |                                                         |
| 1 <sup>st</sup> appearance | Interrupt until resolved to grade 0-1 | 100%                                                    |
| 2 <sup>nd</sup> appearance |                                       | 75%                                                     |
| 3 <sup>rd</sup> appearance |                                       | 50%                                                     |
| 4 <sup>th</sup> appearance | Discontinue treatment permanently.    | -                                                       |
| Grade 3                    |                                       |                                                         |
| 1 <sup>st</sup> appearance | Interrupt until resolved to grade 0-1 | 75%                                                     |
| 2 <sup>nd</sup> appearance |                                       | 50%                                                     |
| 3 <sup>rd</sup> appearance |                                       | -                                                       |



|                                                                                                                                         |                         |                                                                                 |
|-----------------------------------------------------------------------------------------------------------------------------------------|-------------------------|---------------------------------------------------------------------------------|
| Grade 4                                                                                                                                 |                         |                                                                                 |
| 1 <sup>st</sup> appearance                                                                                                              | Discontinue permanently | 50%, if the physician deems it to be in the patient's best interest to continue |
| *Common Terminology Criteria for Adverse Events v4.0 or toxicity management per local label was used, except for the hand-foot syndrome |                         |                                                                                 |

179

180 **4·2 Salvage therapy**

181 The choice of suitable for local treatment is made by investigators' discretion, providing a deemed  
 182 clinical benefit. Local treatment for metastatic lesions, including definitive radiotherapy, surgical  
 183 resection, ablation, or other treatments are used for some patients to control local symptoms and  
 184 eliminate metastases in the bone, liver, lungs, or other organs. Second- or third-line chemotherapy  
 185 will be provided for patients with disease progression.

186

187 **5·0 Observation and Assessment**

188 During the initial screening period, eligible metastatic nasopharyngeal carcinoma patients are treated  
 189 with TPC regimen. Every 2 cycles of chemotherapy, an efficacy evaluation will be performed. The  
 190 patients who are evaluated to achieve disease control after 4–6 cycles of chemotherapy will be officially  
 191 registered.

192 **5·1 Before treatment**

193 All patients are under standardized management for nasopharyngeal carcinoma, and they need to  
 194 perform a series of examinations as well as provide relevant information to confirm pathologic  
 195 diagnosis and clinical stage before admitted into trial:

196 5·1·1 Medical history review

197 5·1·2 Personal data collection

198 5·1·3 Review of present medications and treatment

199 5·1·4 Body examinations, include height, weight and vital signs

200 5·1·5 Physical examination of head and neck region, include nasopharynx and cervical lymph nodes

201 5·1·6 Physical examination of the nervous system

202 5·1·7 Nasal endoscopy and lesion biopsy

203 5·1·8 Biopsy or needle aspiration of distant metastases

204 5·1·9 Blood routine.

205 5·1·10 Epstein-Barr virus (EBV) serologic tests (EBV antibodies, EBV DNA was optional,

206 depending on the laboratory availability of the participating centres).

207 5·1·11 Urine routine.

208 5·1·12 Imaging, including enhanced magnetic resonance imaging (MRI) or enhanced computed

209 tomography (CT) of the head and neck (CT is indicated only in patients with contraindication to

210 MRI)

211 5·1·13 Chest film or CT

212 5·1·14 Emission computed tomography bone scan

213 5·1·15 Abdominal ultrasonography or CT

214 5·1·16 Positron emission tomography (PET)/CT is optional and is performed at the discretion of

215 the attending physician

216 5·1·17 Signed informed consent

217 **5·2 Screening confirmation period**

218 5·2·1 PET-CT, MRI and/or CT of the primary tumour and distant metastases, which is performed

219 after treatment, and complete response, partial response, stable disease, or progressive disease is

220 evaluated according to RECIST 1·1.

221 5·2·2 Physical examinations of the head and neck region, including the nasopharyngeal and cervical

222 lymph nodes

223 **5·3 During treatment**

224 The following aspects need to be assessed from the start to the end of treatment.

225 5·3·1 MRI and/or CT of the primary tumour and distant metastases, which is performed after

226 treatment, and complete response, partial response, stable disease, or progressive disease is

227 evaluated according to RECIST 1·1.

228 5·3·2 General conditions

229 5·3·3 Acute and late toxicities assessment (National Cancer Institute Common Terminology Criteria

230 for Adverse Events [NCI-CTCAE], version 4·0), including for hematological toxicity,

231 gastrointestinal reactions, nephrotoxicity, mucositis, neurotoxicity, etc.

232 5·3·4 Laboratory tests: blood routine and blood biochemistry are required within 1 week prior to  
233 each cycle of chemotherapy and once per week during treatment.

234

## 235 **6 Follow-Up and Recording of Events**

236 After completing treatment, the patients are followed up every 2 to 3 months until death to evaluate the  
237 patients' recent and long-term efficacy and safety profiles. Follow-up method: Record of the patient's  
238 examination data, a doctor's letter with signature to document the visit, or a doctor's follow-up records  
239 collected by telephone Follow-up content: Routine examination of the nasopharyngeal lesions and lymph  
240 nodes, and B-mode ultrasound, chest X-ray, and CT or MR examinations of the distant metastases every  
241 3 months. PET/CT or bone scintigraphy are performed when clinically indicated. The treatment  
242 responses are also evaluated according to the RECIST criteria.

243 All patients will be followed-up until death and cause of death recorded. Deaths due to unknown cause  
244 are counted as death due to nasopharyngeal carcinoma if disease is still present at last assessment.

245

## 246 **7 Safety Measures and Quality Control**

247 7·1 Provide a systemic learning program for every member in the research group Assigned one doctor  
248 in each centre to lead tumour staging, which must be in accordance with the 7<sup>th</sup> edition of American  
249 Joint Committee on Cancer guidelines and to ensure that every patient enrolled is eligible. Patients  
250 are assigned to their groups based on random numbers.

251 7·2 Make a monitoring plan of adverse effects and emergency plan.

252 7·3 Research plan is made by all participating centres and approved by Ethics Committee.

253 7·4 Develop all kinds of standard operation procedures related to this study.

254 7·5 Establish standardized evaluation system to unify diagnostic criteria, curative effect judging  
255 criteria, etc.

256 7·6 Establish professional statistical plan.

257 7·7 Research staffs are trained before the study.

258 7·8 Ensure that every participating centre conducts the study at the same pace.

259 7·9 Arrange quality controller, make quality control plan and check regularly.

260 7·10 Set up coordination committee, curative effect judging group and follow-up team.

261

262 **8·0 Statistical Analysis**

263 **8·1 Endpoint definitions**

264 **8·1·1 Primary endpoint**

265 The progression-free survival is defined as the time from randomised assignment to disease  
266 progression, or death from any cause, whichever occurs first.

267 **8·1·2 Secondary endpoints**

268 8·1·2·1 Overall survival

269 The overall survival is defined as the time from randomised assignment to the date of death from any  
270 cause.

271 8·1·2·2 Duration of response

272 The duration of response is defined as the time from the first cycle of palliative chemotherapy to the  
273 progression of disease, or death from any cause, whichever occurs first.

274 8·1·2·3 Objective response rate

275 Treatment response is assessed by imaging by independent image committee every two cycles until  
276 disease progression. Tumour response is classified according to the RECIST criteria, version 1.1.

277 Complete response is defined as the disappearance of all target lesions. Any pathological lymph  
278 nodes (whether target or nontarget) must have been reduced in the short axis to <10 mm. Partial  
279 response is defined as an at least 30% decrease in the sum of diameters of the target lesions, with the  
280 baseline diameter sum serving as the reference. Progressive disease is defined as an at least 20%  
281 increase in the sum of diameters of the target lesions, with the smallest sum during study serving as  
282 the reference (including the baseline sum). In addition to a relative increase of 20%, the sum must  
283 also demonstrate an absolute increase of at least 5 mm. Stable disease is defined as both insufficient  
284 size reduction to qualify as partial response and an insufficient increase to be considered progressive  
285 disease, with the smallest diameter sum during the study serving as the reference.

286 8·1·2·4 Adverse events

287 Adverse events refer to any adverse medical events that occur on the patient. They do not necessarily  
288 have a causal relationship with treatment. Investigators should keep a detailed record of any adverse  
289 events that occur in the patients. The record of adverse events shall include a description of the  
290 adverse events, the time of occurrence, severity, duration, measures taken, and the final outcomes.

291 Investigators should assess the possible association between the adverse events and the tested drugs

292 according to the five-level classification of "positive relevance, possible irrelevance, positive  
293 irrelevance, and inability to determine." Acute toxicities are assessed according to NCI-CTCAE v4·0.  
294 Acute toxicities include hematological toxicity, mucositis, allergic reactions and other adverse events  
295 and serious adverse events.

#### 296 8·1·2·5 Quality of life

297 EORTC QLQ-C30 and QLQ-H&N35 (v1·0) are used to assess life quality of patients, and the change  
298 of their life quality is recorded and evaluated weekly (Week 1-6) from before the beginning of  
299 treatment to end, 3 months, 6 months, and 1 year after chemotherapy.

### 300 **8·2 Sample size estimation**

301 The trial used a two-sided 5% type I error and had 80% power to detect an improvement in  
302 progression-free survival from 6 months in the BSC group to 11 months in the maintenance group,  
303 which corresponded to a hazard ratio of 0·55 in median progression-free survival.<sup>2,13</sup> In view of these  
304 assumptions, the design was powered for 98 patients to be randomly assigned in 48·0 months with  
305 an additional 12·0 months of follow-up. After considering a 5% dropout rate, we estimated that a  
306 total of 104 patients (52 patients in each group) were required.

### 307 **8·3 Stratification/Randomisation scheme**

#### 308 **8·3·1 Stratification**

309 Patients are stratified according to treatment centres.

#### 310 **8·3·2 Randomisation**

311 Eligible patients are randomised using a 1:1 allocation of patients to either capecitabine maintenance  
312 therapy plus BSC (maintenance group) or BSC alone (BSC group). The randomised block design is  
313 conducted by SYSUCC and block size will be chosen by the statistician (Prof. Qing Liu) so that each  
314 block contains the patients in equal proportion. This procedure helps to ensure both randomness and  
315 investigator blinding (the block sizes are known only to the statistician), as recommended by  
316 Friedman et al (Friedman J, Furberg, C, DeMets D. Fundamentals of clinical trials. New York:  
317 Springer-Verlag; 1998). Randomisation will be generated by the statistician in opaque, sealed  
318 envelopes, labeled by stratum, which will only be unsealed after patient registration. Patients will be  
319 identified by a unique subject number that will remain constant for the duration of the study.

### 320 **8·4 Data management**

321 All information about the enrolled patients after registration will be sent to Sun Yat-Sen University

322 Cancer Centre for management. To monitor the study and make decisions with respect to possible  
323 early closure and publication, we will appoint an independent Data Monitoring Committee.

324 The independent Data Monitoring Committee will meet at least once per year (or will have  
325 discussions via electronic means) to ensure no excessive toxicity and to monitor the quality of the  
326 data and the results. Until it is decided to release the results, only the independent Data Monitoring  
327 Committee will be allowed access to the data.

### 328 **8.5 Case report form**

329 The case report form is designed before the study. The case report form is required to record detailed  
330 medical history, treatment and follow-up information, and it should be easy to fill in as well as save  
331 in database.

### 332 **8.6 Analytical approach**

333 The results of this study are analyzed by the intention-to-treat approach, and all eligible patients are  
334 analyzed according to the randomisation scheme. The Kaplan–Meier estimator is used to estimate  
335 the survival function from lifetime data, and log-rank test to compare the difference of survivals  
336 between two groups. Response rates and the incidence of toxicities are compared by the chi-square  
337 test. Quality of life was analyzed using a mixed effect model. Multiple prognostic factors are  
338 analyzed by Cox regression. The statistical test for progression-free survival was one sided, the left  
339 statistical tests were two-sided, and a p value of less than 0.05 was considered statistically significant.

340

### 341 **9.0 Ethical Considerations**

342 9.1 This study must be approved by an appropriate institutional ethic committee.

343 9.2 An informed consent must be obtained from individual patients. Copy of the Consent Form,  
344 contact number of investigator and ethics committee will be available to patient on request.

345 9.3 All serious and unexpected adverse events or death related to the drugs or radiotherapy must be  
346 reported to the study coordinator immediately. Serious adverse events to be reported include all  
347 deaths during or within 30 days of protocol treatment regardless of cause, grade 5 toxicity, life-  
348 threatening grade 4 toxicity, and/or unexpected toxicity. The Study Coordinator of respective centre  
349 should complete form and fax this within 24 hours to the Principal Investigator (Dr. Yan-Qun Xiang,  
350 Tel: 020-87343379, Fax: 020- 87343392), the centre of clinical trials, the institutional ethic  
351 committee and Sun Yat-Sen University Cancer Centre. Together with the Principal Investigator,

352 appropriate and prompt action will be taken if warranted. Reactions and deaths beyond 30 days from  
353 protocol treatment that are judged definitely unrelated to treatment should not be reported.

354

## 355 **10 References**

- 356 1. Jemal A, Bray F, Center MM, Ferlay J, Ward E, Forman D. Global Cancer Statistics. *Ca-a*  
357 *Cancer Journal for Clinicians*. 2011;61(2):69-90.
- 358 2. Jin Y, Cai X-Y, Shi Y-X, et al. Comparison of five cisplatin-based regimens frequently used  
359 as the first-line protocols in metastatic nasopharyngeal carcinoma. *Journal of Cancer*  
360 *Research and Clinical Oncology*. 2012;138(10):1717-1725.
- 361 3. Gennari A, Stockler M, Puntoni M, et al. Duration of chemotherapy for metastatic breast  
362 cancer: a systematic review and meta-analysis of randomized clinical trials. *J Clin Oncol*.  
363 2011;29(16):2144-2149.
- 364 4. Li YH, Wang FH, Jiang WQ, et al. Phase II study of capecitabine and cisplatin combination  
365 as first-line chemotherapy in Chinese patients with metastatic nasopharyngeal carcinoma.  
366 *Cancer Chemother Pharmacol*. 2008;62(3):539-544.
- 367 5. Maughan TS, James RD, Kerr DJ, et al. Comparison of intermittent and continuous  
368 palliative chemotherapy for advanced colorectal cancer: a multicentre randomised trial.  
369 *Lancet*. 2003;361(9356):457-464.
- 370 6. Li YH, Luo HY, Wang FH, et al. Phase II study of capecitabine plus oxaliplatin (XELOX) as  
371 first-line treatment and followed by maintenance of capecitabine in patients with  
372 metastatic colorectal cancer. *Journal of Cancer Research and Clinical Oncology*.  
373 2009;136(4):503-510.
- 374 7. van Oers MHJ, Klasa R, Marcus RE, et al. Rituximab maintenance improves clinical outcome  
375 of relapsed/resistant follicular non-Hodgkin lymphoma in patients both with and without  
376 rituximab during induction: results of a prospective randomized phase 3 intergroup trial.  
377 *Blood*. 2006;108(10):3295-3301.
- 378 8. Cassidy J, Twelves C, Van Cutsem E, et al. First-line oral capecitabine therapy in metastatic  
379 colorectal cancer: a favorable safety profile compared with intravenous 5-  
380 fluorouracil/leucovorin. *Ann Oncol*. 2002;13(4):566-575.
- 381 9. Crown JP, Diéras V, Staroslawska E, et al. Phase III Trial of Sunitinib in Combination With  
382 Capecitabine Versus Capecitabine Monotherapy for the Treatment of Patients With  
383 Pretreated Metastatic Breast Cancer. *Journal of Clinical Oncology*. 2013;31(23):2870-2878.
- 384 10. Twelves C, Wong A, Nowacki M, et al. Capecitabine as adjuvant treatment for stage III  
385 colon cancer. *The New England journal of medicine*. 2005;352(26):2696-2704.
- 386 11. Al-Sarraf M, LeBlanc M, Giri P, et al. Chemoradiotherapy versus radiotherapy in patients  
387 with advanced nasopharyngeal cancer: phase III randomized Intergroup study 0099.  
388 *Journal of clinical oncology : official journal of the American Society of Clinical Oncology*.  
389 1998;16(4):1310-1317.
- 390 12. Chua D, Wei WI, Sham JS, Au GK. Capecitabine monotherapy for recurrent and metastatic  
391 nasopharyngeal cancer. *Jpn J Clin Oncol*. 2008;38(4):244-249.
- 392 13. Hong R, Sheen T, Ko J, Hsu M, Wang C, Ting L. Induction with mitomycin C, doxorubicin,  
393 cisplatin and maintenance with weekly 5-fluorouracil, leucovorin for treatment of

394 metastatic nasopharyngeal carcinoma: a phase II study. *Br J Cancer*. 1999;80(12):1962-  
395 1967.



## Summary of changes in protocol:

| Page | item                   | Before amendment                                                                                                                           | After amendment                                                                                                                            | reason                                                                                                        | version                                   |
|------|------------------------|--------------------------------------------------------------------------------------------------------------------------------------------|--------------------------------------------------------------------------------------------------------------------------------------------|---------------------------------------------------------------------------------------------------------------|-------------------------------------------|
| P6-7 | Treatment Plan         | Capecitabine maintenance therapy is 1,250 mg/m <sup>2</sup> orally twice daily on days 1–14 and once every 3 weeks for maximum of 2 years. | Capecitabine maintenance therapy is 1,000 mg/m <sup>2</sup> orally twice daily on days 1–14 and once every 3 weeks for maximum of 2 years. | Taking into account the patient's completion and tolerance of capecitabine.                                   | Ver.2.0<br>approved date:<br>May 28, 2016 |
| P13  | Sample size estimation | 142 subjects will be randomized in a 1:1 fashion (71 in each arm)                                                                          | 104 subjects will be randomized in a 1:1 fashion (52 in each arm)                                                                          | Considering the influence of duration of enrollment and follow-up on sample size, also too high drop-out rate | Ver.3.0<br>approved date:<br>May 30, 2018 |

397  
398  
399  
400  
401  
402  
403  
404  
405

**ECOG PERFORMANCE STATUS**

|          |                                                                                                                                                           |
|----------|-----------------------------------------------------------------------------------------------------------------------------------------------------------|
| <b>0</b> | Fully active, able to carry on all pre-disease performance without restriction                                                                            |
| <b>1</b> | Restricted in physically strenuous activity but ambulatory and able to carry out work of a light or sedentary nature, e.g., light house work, office work |
| <b>2</b> | Ambulatory and capable of all selfcare but unable to carry out any work activities; up and about more than 50% of waking hours                            |
| <b>3</b> | Capable of only limited selfcare; confined to bed or chair more than 50% of waking hours                                                                  |
| <b>4</b> | Completely disabled; cannot carry on any selfcare; totally confined to bed or chair                                                                       |
| <b>5</b> | Dead                                                                                                                                                      |

408 **Appendix II**  
409 The CTCAE v4.0 manual can be found at the following URL:  
410 <http://ctep.cancer.gov/forms/CTCAEv4.pdf>.
