# Supplementary material
Source: PubMed Central journal article supplement (PMC8855317)
Supplement: jamaoncol-e217366-s002.pdf [file jamaoncol-e217366-s002.pdf]

## Supplementary Online Content

Liu G-Y, Li W-Z, Wang D-S, et al. Effect of capecitabine maintenance therapy plus best supportive care vs best supportive care alone on progression-free survival among patients with newly diagnosed metastatic nasopharyngeal carcinoma who had received induction chemotherapy: a phase 3 randomized clinical trial. *JAMA Oncol*. Published online February 17, 2022. doi:10.1001/jamaoncol.2021.7366

**eTable 1.** Response to the Induction Chemotherapy

**eTable 2.** Summary of Concomitant Therapy or Medications and Subsequent Therapies for Progressive Patients

**eTable 3.** Pattern of Failure and Disease Status at Last Assessment and Best Tumor Response to Maintenance Therapy

**eTable 4.** Treatment-Emergent Adverse Events During TPC Induction Chemotherapy

**eFigure 1.** (A) Treatment Scheme. (B) Definition of Duration of Response.

**eFigure 2.** Kaplan-Meier Analysis of Overall Survival in the Intention-to-Treat Population

**eFigure 3.** Kaplan-Meier Analysis of Overall Survival Between Maintenance Group and BSC Group Excluded Crossover Treatment

This supplementary material has been provided by the authors to give readers additional information about their work.

**eTable 1.** Response to the Induction Chemotherapy

| Response                | No. (%)                            |
|-------------------------|------------------------------------|
|                         | TPC induction chemotherapy (n=118) |
| Best response           |                                    |
| Complete response       | 13 (11.0)                          |
| Partial response        | 74 (62.7)                          |
| Stable disease          | 21 (17.8)                          |
| Progressive disease     | 10 (8.5)                           |
| Not assessable          | 0                                  |
| Objective response rate | 87 (73.7)                          |
| Disease control rate    | 108 (91.5)                         |

TPC, taxol, cisplatin, and capecitabine.

**eTable 2.** Summary of Concomitant Therapy or Medications and Subsequent Therapies for Progressive Patients

| <b>Concomitant therapy or medications</b>           | Capecitabine plus BSC | BSC alone  |
|-----------------------------------------------------|-----------------------|------------|
| Locoregional radiotherapy                           | 22 (52.8%)            | 20 (47.6%) |
| Bisphosphonates                                     | 21 (51.2%)            | 20 (48.8%) |
| <b>Subsequent therapies</b>                         |                       |            |
| <b>Lines of therapy for progressive disease</b>     |                       |            |
| 0                                                   | 6 (26.1%)             | 10 (27.0%) |
| 1                                                   | 9 (39.1%)             | 8 (21.6%)  |
| 2                                                   | 3 (13.0%)             | 11 (29.7%) |
| 3 or more                                           | 5 (21.7%)             | 8 (21.6%)  |
| <b>Subsequent chemotherapy</b>                      |                       |            |
| Gemcitabine plus cisplatin/carboplatin              | 9 (39.1%)             | 10 (27.0%) |
| Docetaxel plus cisplatin/carboplatin                | 1 (4.3%)              | 2 (5.4%)   |
| Docetaxel plus cisplatin plus capecitabine          | 4 (17.4%)             | 9 (24.3%)  |
| Others                                              | 2 (8.7%)              | 6 (16.2%)  |
| Locoregional radiotherapy                           | 2 (8.7%)              | 2 (5.4%)   |
| <b>Palliative treatment to the metastatic sites</b> |                       |            |
| Bone                                                | 2 (8.7%)              | 2 (5.4%)   |
| Liver                                               | 1 (4.3%)              | 3 (8.1%)   |
| Lung                                                | 4 (17.4%)             | 3 (8.1%)   |
| BSC, best supportive care.                          |                       |            |

**eTable 3.** Pattern of Failure and Disease Status at Last Assessment and Best Tumor Response to Maintenance Therapy

| Status                     | No. (%)                   |                  |
|----------------------------|---------------------------|------------------|
|                            | Capecitabine + BSC (n=52) | BSC alone (n=52) |
| Outcome at last assessment |                           |                  |
| Disease progression        | 23 (44.2)                 | 37 (71.2)        |
| Died                       | 14 (26.9)                 | 23 (44.2)        |
| Alive                      | 38 (73.1)                 | 29 (55.8)        |
| Best response to treatment |                           |                  |
| Complete response          | 3 (5.8)                   | 0                |
| Partial response           | 10 (19.2)                 | 6 (11.5)         |
| Stable disease             | 34 (65.4)                 | 34 (65.4)        |
| Progressive disease        | 4 (7.7)                   | 10 (19.2)        |
| Not evaluable              | 1 (1.9)                   | 2 (3.8)          |
| Objective response rate    | 13 (25.0)                 | 6 (11.5)         |
| Disease control rate       | 47 (90.4)                 | 40 (76.9)        |
| BSC, best supportive care. |                           |                  |

**eTable 4.** Treatment-Emergent Adverse Events During TPC Induction Chemotherapy

|                            | No. (%)                   |           |         |                  |          |         |
|----------------------------|---------------------------|-----------|---------|------------------|----------|---------|
|                            | Capecitabine + BSC (n=52) |           |         | BSC alone (n=52) |          |         |
|                            | Grade 1-2                 | Grade 3   | Grade 4 | Grade 1-2        | Grade 3  | Grade 4 |
| Hematologic toxicities     |                           |           |         |                  |          |         |
| Anemia                     | 35 (67.3)                 | 5 (9.6)   | 2 (3.8) | 40 (76.9)        | 3 (5.8)  | 0       |
| Neutropenia                | 13 (25.0)                 | 10 (19.2) | 5 (9.6) | 14 (26.9)        | 9 (17.3) | 5 (9.6) |
| Thrombocytopenia           | 12 (23.1)                 | 1 (1.9)   | 0       | 5 (9.6)          | 1 (1.9)  | 1 (1.9) |
| Non-hematologic toxicities |                           |           |         |                  |          |         |
| Mucositis                  | 20 (38.5)                 | 3 (5.8)   | 1 (1.9) | 10 (19.2)        | 1 (1.9)  | 0       |
| Nausea/Vomiting            | 7 (13.5)                  | 7 (13.5)  | 0       | 10 (19.2)        | 4 (7.7)  | 0       |
| Fatigue                    | 6 (11.5)                  | 1 (1.9)   | 0       | 2 (3.8)          | 0        | 0       |
| Hand-foot syndrome         | 5 (9.6)                   | 3 (5.8)   | 0       | 6 (11.5)         | 3 (5.8)  | 0       |
| Diarrhea                   | 1 (1.9)                   | 0         | 0       | 2 (3.8)          | 0        | 0       |

TPC, taxol, cisplatin, and capecitabine. BSC, best supportive care.

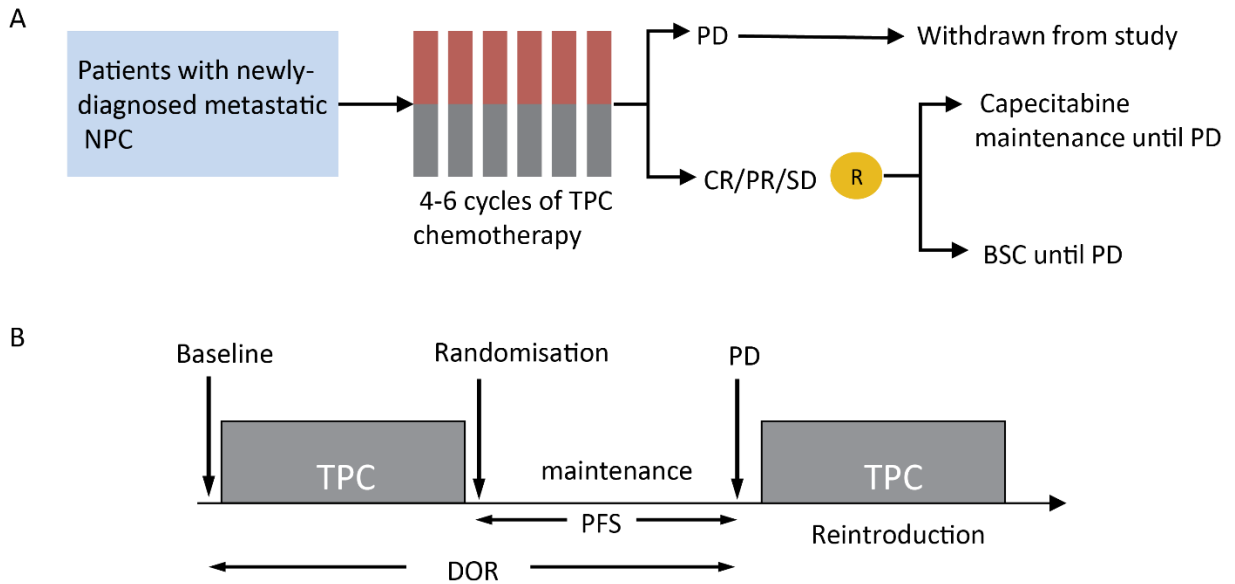

**eFigure 1.** (A) Treatment Scheme. (B) Definition of Duration of Response. (\*) Patients included in the final analyses of survival and secondary efficacy variables with intent-to-treat principle. CR, complete response; NPC, nasopharyngeal carcinoma; PD, progressive disease; PR, partial response; R, random assignment; SD, stable disease; BSC, best supportive care.

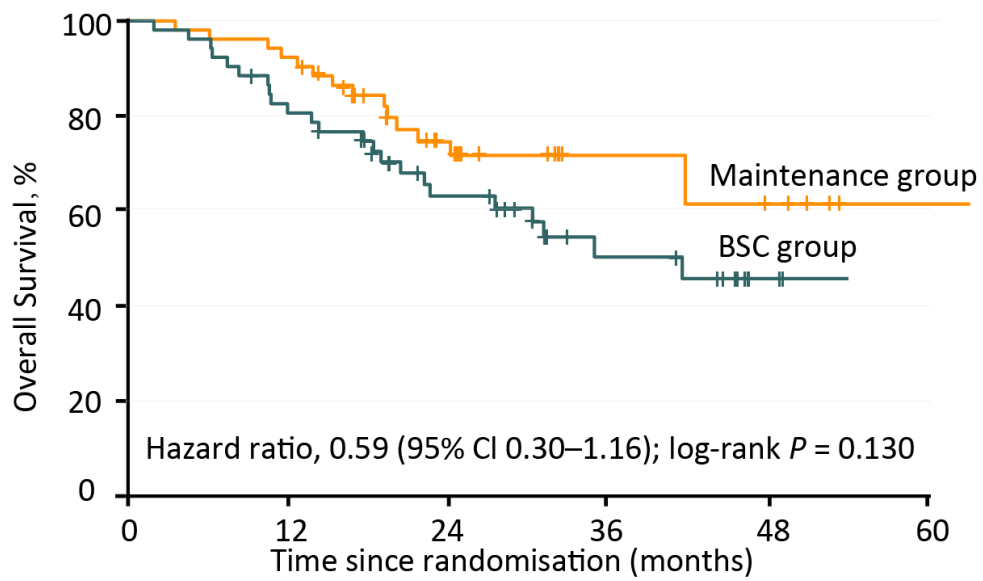

**No. at risk**

|                   |    |    |    |    |   |   |
|-------------------|----|----|----|----|---|---|
| Maintenance group | 52 | 48 | 28 | 15 | 6 | 1 |
| BSC group         | 52 | 41 | 26 | 12 | 6 | 0 |

**eFigure 2.** Kaplan-Meier Analysis of Overall Survival in the Intention-to-Treat Population

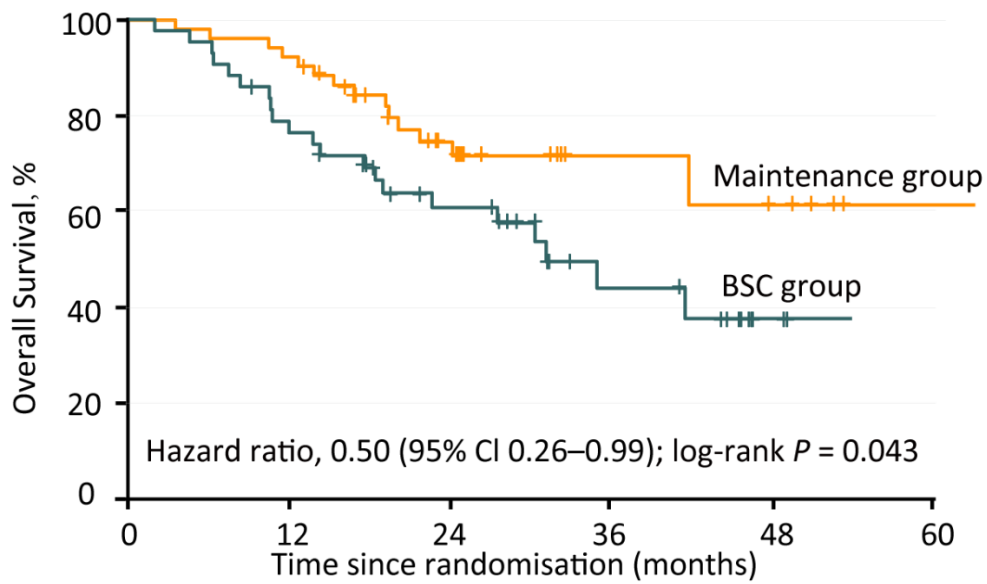

**No. at risk**

|                   |    |    |    |    |   |   |
|-------------------|----|----|----|----|---|---|
| Maintenance group | 52 | 48 | 28 | 15 | 6 | 1 |
| BSC group         | 43 | 32 | 20 | 8  | 3 | 0 |

**eFigure 3.** Kaplan-Meier Analysis of Overall Survival Between Maintenance Group and BSC Group

Excluded Crossover Treatment
