# Supplementary material
Source: PubMed Central journal article supplement (PMC8855317)
Supplement: jamaoncol-e217366-s003.pdf [file jamaoncol-e217366-s003.pdf]

## Data Sharing Statement

Liu. Effect of Capecitabine Maintenance Therapy Plus Best Supportive Care vs Best Supportive Care Alone on Progression-Free Survival Among Patients With Newly Diagnosed Metastatic Nasopharyngeal Carcinoma Who Had Received Induction Chemotherapy. *JAMA Oncol.* Published February 17, 2022. doi:10.1001/jamaoncol.2021.7366

### Data

**Data available:** No

### Additional Information

**Explanation for why data not available:** Data Sharing Statement: Considering patients' privacy and related regulations in China, we chose not to make the database public to everyone. However, our raw database will be deposited on the Research Data Deposit public platform ([www.researchdata.org.cn](http://www.researchdata.org.cn)). If a researcher wants to use our raw data for scientific research purposes, he or she could apply for use with our corresponding author and database administrator.
